# Supplementary material
Source: HighWire-hosted journal article supplement (https://www.life-science-alliance.org/content/2/2/e201900323/F9)

Chemidoc-Raw figure for Figure 6A.

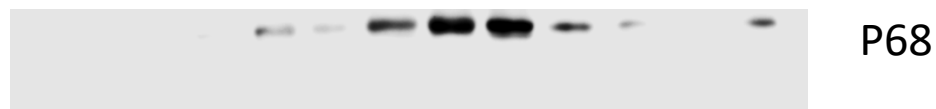

Chemidoc-Raw figure for Figure 6B.

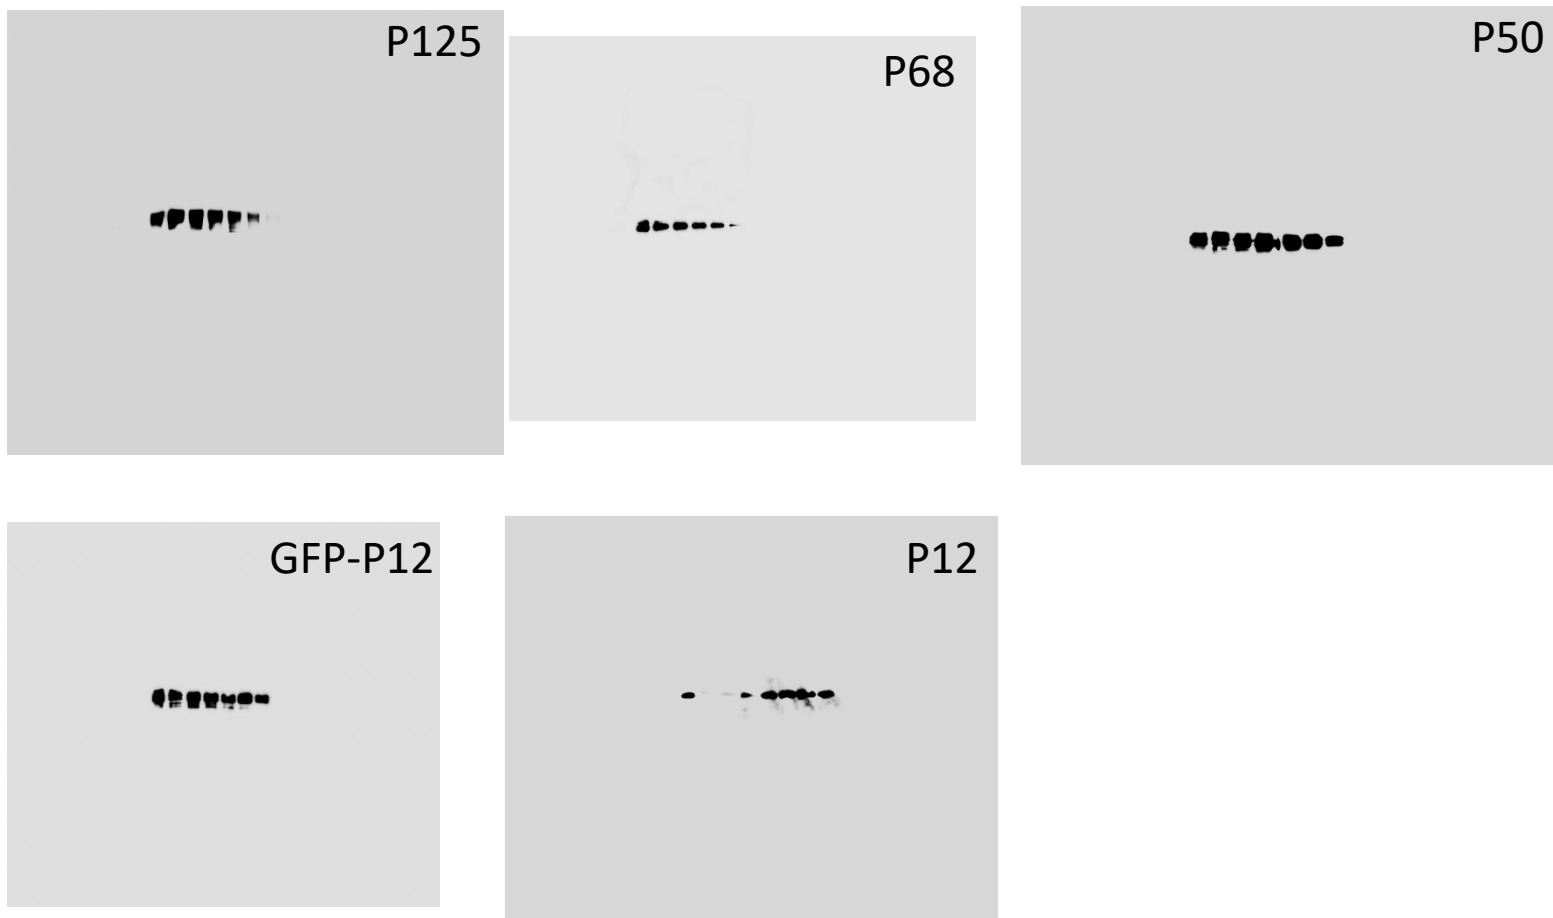

Supplement: inline-supplementary-material-7 [file inline-supplementary-material-7.pdf]
